1 **Second round of the interlaboratory comparison (ILC) exercise of SARS-CoV-2 molecular**  
2 **detection assays being used by 45 veterinary diagnostic laboratories in the US**

3  
4 **Kaiping Deng, Steffen Uhlig, Laura B. Goodman, Hon S. Ip, Mary Lea Killian, Sarah M.**  
5 **Nemser, Jodie Ulaszek, Shannon Kiener, Matthew Kmet, Kirstin Frost, Karina Hettwer,**  
6 **Bertrand Colson, Kapil Nichani, Anja Schlierf, Andriy Tkachenko, Mothomang Mlalazi-**  
7 **Oyinloye, Andrew Scott, Ravinder Reddy, Gregory H. Tyson<sup>1</sup>**

8  
9 Division of Food Processing Science and Technology, U.S. Food and Drug Administration,  
10 Bedford Park, IL, USA (Deng, Kiener, Kmet, Reddy); QuoData – Quality & Statistics, Dresden,  
11 Germany (Uhlig, Frost, Hettwer, Colson, Nichani, Schlierf); College of Veterinary Medicine,  
12 Cornell University, Ithaca, NY, USA (Goodman); National Wildlife Health Center, U.S.  
13 Geological Survey, Madison, WI, USA (Ip); National Veterinary Services Laboratory, National  
14 Animal and Plant Health Inspection Service, U.S. Department of Agriculture, Ames, IA, USA  
15 (Killian); Center for Veterinary Medicine, U.S. Food and Drug Administration, Laurel, MD,  
16 USA (Nemser, Tkachenko, Oyinloye, Tyson); Institute for Food Safety and Health, Illinois  
17 Institute of Technology, Bedford Park, IL, USA (Ulaszek); Integrated Consortium of Laboratory  
18 Networks, Washington, DC, USA (Scott).

19  
20 <sup>1</sup>Corresponding author: Gregory Tyson, 8401 Murkirk Road, Laurel, MD 20708 USA.

21 Gregory.Tyson@fda.hhs.gov.

22  
23 Running title: Inter-laboratory comparison of SARS-CoV-2 detection

24 **Abstract.** The coronavirus disease 2019 (COVID-19) pandemic presents a continued public  
25 health challenge across the world. Veterinary diagnostic laboratories in the U.S. use real-time  
26 reverse transcriptase PCR (RT-PCR) for animal testing, and many are certified for testing human  
27 samples, so ensuring laboratories have sensitive and specific SARS-CoV-2 testing methods is a  
28 critical component of the pandemic response. In 2020, the FDA Veterinary Laboratory  
29 Investigation and Response Network (Vet-LIRN) led the first round of an Inter-Laboratory  
30 Comparison (ILC) Exercise to help laboratories evaluate their existing real-time RT-PCR  
31 methods for detecting SARS-CoV-2. The ILC1 results indicated that all participating laboratories  
32 were able to detect the viral RNA spiked in buffer and PrimeStore molecular transport medium  
33 (MTM). The current ILC (ILC2) aimed to extend ILC1 by evaluating analytical sensitivity and  
34 specificity of the methods used by participating laboratories to detect three SARS-CoV-2  
35 variants (B.1, B.1.1.7 (Alpha) and B.1.351 (Beta)). ILC2 samples were prepared with RNA at  
36 levels between 10 to 10,000 copies per 50  $\mu$ L MTM. Fifty-seven sets of results from 45  
37 laboratories were qualitatively and quantitatively analyzed according to the principles of ISO  
38 16140-2:2016. The results showed that over 95% of analysts detected the SARS-CoV-2 RNA in  
39 MTM at 500 copies or higher for all three variants. In addition, 81% and 92% of the analysts  
40 achieved a Level of Detection ( $LOD_{95\text{eff. vol.}}$ ) below 20 copies in the assays with nucleocapsid  
41 markers N1 and N2, respectively. The analytical specificity of the evaluated methods was over  
42 99%. The study allowed participating laboratories to assess their current method performance,  
43 identify possible limitations, and recognize method strengths as part of a continuous learning  
44 environment to support the critical need for reliable diagnosis of COVID-19 in potentially  
45 infected animals and humans.

46 **Keywords:** interlaboratory comparison; COVID-19; real-time RT-PCR; SARS-CoV-2.

47 Emergence of Severe Acute Respiratory Syndrome Coronavirus (SARS-CoV) in 2003<sup>1</sup> and the  
48 Middle Eastern Respiratory Syndrome Coronavirus (MERS-CoV) in 2012<sup>2</sup> showed the zoonotic  
49 potential of animal coronaviruses. SARS-CoV-2-transmission has been documented among  
50 animals, from humans to animals, and from animals to humans in the COVID-19 pandemic<sup>1,3-7</sup>.  
51 SARS-CoV-2 has been detected in wild and domestic animals around the world<sup>8-17</sup>. A recent U.S.  
52 animal surveillance study indicated high prevalence of SARS-CoV-2 among domestic and wild  
53 free-roaming animals tested on mink farms<sup>18</sup>. Conducting animal surveillance and routine testing  
54 with a sensitive and specific SARS-CoV-2 detection method is important in outbreak response  
55 and prevention. A joint statement from United Nations Food and Agriculture Organisation  
56 (FAO)/World Organization for Animal Health (OIE)/World Health Organisation (WHO) also  
57 noted the need to promote the monitoring of wildlife known to be potentially susceptible to  
58 SARS-CoV-2 and reporting of confirmed animal cases of SARS-CoV-2 to OIE, with these  
59 actions requiring a sensitive and accurate SARS-CoV-2 test.

60 In response to the spread of SARS-CoV-2 in animals, veterinary diagnostic laboratories  
61 receive animal specimens for its detection. Many veterinary diagnostic laboratories also have  
62 Clinical Laboratory Improvement Amendments (CLIA) certification and test human samples,  
63 meaning they play a critical One Health role in assessing the impact of COVID-19 on both  
64 humans and animals. Among the available diagnostic tests, detection of the viral RNA with real-  
65 time reverse transcriptase polymerase chain reaction (RT-PCR) is the most widely used,  
66 sensitive, and specific diagnostic method for COVID-19.

67 The U.S. FDA's Veterinary Laboratory Investigation and Response Network (Vet-LIRN)  
68 is a network of veterinary diagnostic laboratories that investigates potential animal food or drug  
69 related issues<sup>19</sup>. In August 2020, an Inter-Laboratory Comparison Exercise Round 1 (ILC1) was

70 collaboratively conducted by FDA and other organizations to qualitatively and quantitatively  
71 evaluate the SARS-CoV-2 real-time RT-PCR detection methods used by veterinary diagnostic  
72 laboratories<sup>20</sup>. The results indicated that the ILC1 participants effectively detected SARS-CoV-2  
73 RNA in MTM with their methods routinely used for testing clinical specimens. Two-thirds of the  
74 laboratories achieved nearly the theoretical optimum Level of Detection (LOD) of three copies<sup>20</sup>.  
75 However, the viral RNA spiking levels of ILC1 were not low enough to evaluate the method  
76 analytical sensitivity, specifically the LOD for each individual participant. Hence, this second  
77 round of ILC (ILC2) was designed to provide more challenging samples from which marginal  
78 detection results could be generated for statistical analysis.

79         New lineages of SARS-CoV-2 were reported and quickly became dominant variants in  
80 different parts of the world since late 2020<sup>21</sup> (<https://covariants.org/>), including the Alpha variant  
81 (B.1.1.7) and the Beta variant (B.1.351)<sup>22,23</sup>. Additional variants of concern such as the Delta  
82 variant (B.1.617) and Omicron variant (B.1.1.529) subsequently emerged. These emerging  
83 variants carry numerous mutations throughout the viral genome, including on the spike (*S*),  
84 envelope (*E*), nucleocapsid (*N*) and/or *ORF1ab* genes. Most participants used assays detecting  
85 the *N* gene in their routine testing, specifically markers N1 and N2, whereas some laboratories  
86 used other gene markers such as *ORF1ab*, *S* or *E* genes. In ILC2, the variants designated as  
87 Alpha (B.1.1.7) and Beta (B.1.351) were used in addition to U.S. B.1, which was the most  
88 prevalent lineage in the U.S. at the end of 2020 and the beginning of 2021. The ILC2 samples  
89 were shipped to laboratories in June of 2021. Detection of these variants with different markers  
90 used by participants was further studied in ILC2.

91         ILC2 was collaboratively conducted by the following: (i) the FDA's Center for  
92 Veterinary Medicine's Vet-LIRN, (ii) the Moffett Proficiency Testing (PT) Laboratory located at

93 the Institute for Food Safety and Health at the Illinois Institute of Technology (IIT/IFSH) and the  
94 FDA Division of Food Processing Science and Technology, (iii) QuoData Quality and Statistics  
95 GmbH in Germany, (iv) Cornell University, (v) the U.S. Geological Survey (USGS) National  
96 Wildlife Center, (vi) USDA's National Veterinary Services Laboratories (NVSL), National  
97 Animal Health Laboratory Network (NAHLN), (vii) the Integrated Consortium of Laboratory  
98 Networks (ICLN), and (viii) 45 participating laboratories. The study was a continuation of the  
99 previous ILC1 with the following objectives: (1) to evaluate analytical sensitivity (i.e., LOD) of  
100 the methods routinely used by participating laboratories to detect SARS-CoV-2 variant (B.1)  
101 RNA; (2) to evaluate the ability of the participants' methods to detect SARS-CoV-2 variants  
102 Alpha (B.1.1.7) and Beta (B.1.351); and (3) to evaluate the methods' specificity by investigating  
103 cross-reactivity with a non-SARS-CoV-2 animal coronavirus, Feline Infectious Peritonitis virus  
104 (FIPV) RNA. The goal was to allow participating laboratories to assess their method  
105 performance, including strengths and limitations, to support reliable diagnosis of COVID-19 in  
106 potentially infected animals and humans.

107

## 108 **Materials and methods**

### 109 *Determination of SARS-CoV-2 RNA concentration*

110 Three synthetic SARS-CoV-2 genomic RNA products were purchased from Twist Bioscience  
111 for the ILC2 study: B.1 (Twist Control #10), Alpha (B.1.1.7) (Twist Control #15) and Beta  
112 (B.1.351) (Twist Control #16). These ssRNA controls are manufactured by *in vitro* transcription  
113 from six non-overlapping 5 kb synthetic gene fragments. According to the manufacturer, the  
114 synthetic RNAs cover 99.9% of the bases of the viral genomes that were predominant in the U.S.,  
115 including the USA/CA-PC101P/2020 (B.1), United Kingdom [Alpha (B.1.1.7)] and South Africa  
116 [Beta (B.1.351)] variants (GISAID names: USA/CA-PC101P/2020, England/205041766/2020

117 and South Africa/KRISP-EC-K005299/2020), respectively. Droplet digital reverse-transcription  
118 PCR (RT-ddPCR)-based quantification of these controls was performed by the Cornell  
119 University Genomics Facility using the QX200 instrument (Bio-Rad). The CDC N1 primers and  
120 probe (IDT) were used for this analysis with the 1-Step RT-ddPCR advanced kit for probes (Bio-  
121 Rad), on duplicate serial dilutions of the templates. The concentrations of the original Twist B.1,  
122 Alpha (B.1.1.7), and Beta (B.1.351) controls were determined by RT-ddPCR as 150,000,  
123 345,000, and 300,000 copies/ $\mu$ L, respectively. Serial dilutions of the controls were then made in  
124 Nucleic Acid Dilution Solution (NADS) from the VetMAX™ Xeno™ Internal Positive Control  
125 DNA kit (Applied Biosystems) to levels of  $2 \times 10^5$  to 2 copies per  $\mu$ L in ten-fold dilutions.

#### 126 *Feline Infectious Peritonitis virus (FIPV) RNA preparation*

127 A cryopreserved suspension of the culture-adapted Black strain of FIPV was provided by Dr.  
128 Gary Whittaker at Cornell University. The culture was grown in Fcwf-4 CU cells as previously  
129 described<sup>24</sup>. RNA was extracted and purified using the MagMAX™ Viral/Pathogen kit (Thermo  
130 Fisher). Quantification by RT-ddPCR was performed as described above but with the P009 and  
131 P010 primers and P9/ P10 probe<sup>25</sup>, that targets the N gene of FIPV.

#### 132 *ILC2 sample stability and homogeneity studies*

133 Acceptable homogeneity, stability, and targeted spike levels were verified in three studies. In the  
134 first study (Study-1), samples were analyzed by two analysts in two trials on days 0, 7, 14, and  
135 21 of storage at -80 °C. Eighteen samples (S1 to S18) for each set were prepared. S1-S16 were  
136 prepared by adding B.1 RNA to PrimeStore Molecular Transport Medium (MTM, Longhorn  
137 Vaccines & Diagnostics, LLC) at levels of 0, 10, 20, 50, 100, or 1,000 copies per 50  $\mu$ L. S17 and  
138 S18 were prepared by adding Alpha (B.1.1.7) and Beta (B.1.351) to MTM at 1,000 copies per 50  
139  $\mu$ L. The RNA in Study-1 samples were isolated using Qiagen RNeasy Mini kit (Qiagen) and

140 subsequently analyzed with AgPath-ID™ One-Step RT-PCR kit using specific primers (i.e., N1  
141 and N2 targeting two regions of the viral nucleocapsid gene) and probes for the virus N gene  
142 (IDT), according to the CDC 2019-nCoV EUA Kit method<sup>26</sup>. The RT-PCR was performed on  
143 the Applied Biosystems 7500 Fast Real-Time PCR Instrument with version 2.3 software.

144 In Study-2 and Study-3, two sets of randomly chosen ILC2 samples (see their preparation  
145 below) were analyzed using the procedure described above: the first set (Study-2) was analyzed  
146 prior to the shipment day and the second set (Study-3) was analyzed two days after the shipment  
147 day when the ILC2 participants started to test their samples.

148 Qualitative data (Supplemental Table 1A, 1C and 1D) indicated that all samples with  
149 RNA concentration at or above 50 copies per 50  $\mu$ L were detected, and blank samples were not  
150 detected. The Ct values were subjected to quantitative analysis. There was no significant  
151 difference in the Ct values for the samples after 7, 14 and 21-day storage in Study 1  
152 (Supplemental Table 1B), indicating the samples were stable for 21 days. The sample standard  
153 deviation ( $s_{\text{sample}}$ ) and standard deviation for the replicate measurements ( $s_e$ ) were in a range of 0-  
154 1.13 and 0.11-1.14, respectively, when they were calculated based on the Ct values. The  
155 homogeneity and stability results demonstrated that the trial samples were deemed sufficiently  
156 homogenous and stable, and the inoculation process was suitable to produce the targeted ILC2  
157 samples.

#### 158 *ILC2 sample preparation and pre-shipment tests*

159 The RNA was inoculated into MTM in bulk, and 150  $\mu$ L aliquots of each sample were  
160 transferred into 1.5-mL snap-top microfuge tubes, according to the sample composition in Table  
161 1. All samples were stored at -80 °C before shipping. To confirm successful inoculation before  
162 shipping, a set of ILC2 samples was tested as described in the Study-2 above. Another set of

163 ILC2 samples was shipped to Cornell University to confirm the spiking levels by RT-ddPCR  
164 using the procedures described above.

165 For the pre-shipment temperature trial, the packaging configuration was tested by  
166 packaging mock samples in dry ice in a shipping box according to the International Air  
167 Transport Association Dangerous Goods Regulations. After holding the box for 72 hours at room  
168 temperature, the sample containers were observed and qualitatively assessed as frozen or not.  
169 The assessment showed that the packaging configuration kept the primary sample containers  
170 frozen for 72 hours.

#### 171 *ILC2 sample distribution*

172 The final shipment samples were packaged using the Saf-T-Pak STP-320 UN 3373 Category B  
173 Frozen Insulated Shipping System according to the manufacturer-provided instructions and  
174 shipped via FedEx Priority Overnight. A total of 59 sets of blind-coded samples were shipped on  
175 dry ice to the 45 participating laboratories (14 laboratories requested a second set of samples to  
176 test two methods or to test by two analysts). Participants were not aware of spike levels (e.g.,  
177 analyte concentration) or number of replicates per spike level prepared by the organizers.

#### 178 *Sample analysis and data acquisition*

179 Participants were instructed to use the SARS-CoV-2 RNA extraction and detection methods that  
180 they routinely use in their laboratories. To facilitate statistical analysis, all analysts used the same  
181 input volume (50 µl) for RNA extraction and reported their volumes of eluted RNA and PCR  
182 template to the ICL organizer. Sample handling and result reporting instructions were discussed  
183 with the participants via two training sessions. To ensure confidentiality, each analyst was  
184 assigned an analyst identification number (AIN). Each analyst reported the results as “detected”  
185 (D), “not detected” (N), or “inconclusive” (I) for SARS-CoV-2 viral RNA, according to their



186 own laboratory's protocols. Participants were also instructed to report Ct values for each PCR  
187 marker used, cut-off values, basic method information (e.g., PCR instrument model, extraction  
188 kit, and internal controls, as well as extraction, elution, and PCR input volumes), and any  
189 modifications to their methods. Detailed methods from each participating laboratory were kept  
190 confidential to maintain anonymity. We therefore refer to each assay target as "marker",  
191 consistent with the terminology used in the ILC1 publication<sup>20</sup>.

### 192 *Qualitative and quantitative assessments*

193 Rate of detection (ROD), the number of positive results divided by the total number of results,  
194 was calculated for all markers used (i.e., overall detection) and for N1 and N2 markers separately.  
195 Inconclusive results were classified as "not detected" for the assessment.

196 Analytical sensitivity (Level of Detection, LOD) was calculated based on a probability of  
197 detection (POD) model. The complementary log-log regression model<sup>27,28</sup> (i.e., the statistical  
198 model that corresponds to the Poisson assumption) was modified to take into consideration the  
199 analyst-specific actual copy numbers per well for calculating the marker- and analyst-specific  
200 POD curves. The POD curve was calculated based on ROD values obtained from the original  
201 (i.e., not rounded) Ct values. From these POD curves, the LOD95 values (the numbers of copies  
202 at which a POD of 95% is achieved) were derived. LOD95 was based on the effective volume  
203 (i.e., that part of the original sample volume used in the RT-PCR), which was calculated based  
204 on three volumes (e.g., extraction, elution, and PCR input volumes) reported by participants to  
205 organizers (hereafter referred to as LOD95<sub>eff. vol</sub>). The adjustment was necessary for meaningful  
206 evaluation of method sensitivities for the individual laboratories.

207 The PCR amplification rate (i.e., efficiency) was calculated separately for each marker  
208 based on the nominal copy numbers (equivalent to dilution levels) and the submitted Ct values.

209  
210  
211  
212  
213  
214  
215  
216  
217  
218  
219  
220  
221  
222  
223  
224  
225  
226  
227  
228  
229  
230

## Results

### *Overall detection results*

Fifty-seven (57) datasets submitted from 45 laboratories were collected and analyzed. The analysts submitted qualitative “overall detection” results (Table 2), Ct values for various markers (Supplemental Tables 2-6), Ct cut-off values (Table 3), and basic method information. The analysts targeted different markers for the SARS-CoV-2 RNA testing. The “overall detection” results and Ct cut-off values reported are based on criteria selected by individual analysts according to their internal protocols. Comparative evaluation of qualitative “overall detection” results, reported Ct values and the Ct cut-off values revealed that individual analysts used different decision-making criteria during interpretation of their datasets (Table 2). Specifically, some analysts reported Detected (D), whereas other analysts reported Not Detected (N) or Inconclusive (I) when some, but not all, targeted markers were detected (i.e., one marker was detected out of two targeted markers or three markers were detected out of four targeted markers).

The ROD was calculated and summarized at each spike level (Table 4). For the overall detection as well as for the two most common markers (N1 and N2), the ROD values increased with increasing copy numbers as expected, consistently achieving ROD values above 95% at 500 copies / 50  $\mu$ L. At 100 copies / 50  $\mu$ L, overall detection was 85%. Lower copy levels were also included to help assess levels of detection, and at the lowest spike level of 10 copies/ 50  $\mu$ L, 26% of samples were still identified as positive for SARS-CoV-2. One exception was observed where for B.1 samples at 10,000 copies per 50  $\mu$ L, the ROD for N2 marker was less than 100% (i.e.,

231 97%). This was due to one false negative result submitted at this high level, which also affected  
232 the calculated value of  $LOD_{95\text{eff. vol.}}$  for the analyst (AIN 278).

233 We also sought to determine whether ROD varied for different SARS-CoV-2 variants.  
234 For the Alpha (B.1.1.7) and Beta (B.1.351) variants, ROD values for N1, N2, and overall  
235 detection were nearly identical to the results from B.1, indicating laboratories were able to detect  
236 SARS-CoV-2 regardless of the variant. Among blank samples, there was only one false positive  
237 (AIN 294), indicating a false positive rate of  $< 1\%$  for all participants.

#### 238 *Analytical Specificity of methods*

239 The analytical specificity of the methods was evaluated by including the feline infectious  
240 peritonitis virus (FIPV) coronavirus RNA as a confounder. As shown in Table 2, only one  
241 analyst (AIN 296) reported one false positive for one of the two “Blank + FIPV” samples.  
242 Importantly, this analyst detected the N2 marker, but not the N1 marker for this sample (see  
243 Supplemental Table 2) and thus reported the sample as “Detected” according to their internal  
244 protocols. Similarly, two other analysts (AIN 267 and 286) detected the “Blank + FIPV” samples  
245 with only one of the markers (see Supplemental Table 2 and 5), however, they reported the  
246 sample as “Inconclusive” according to their internal protocols. Overall, ILC2 results revealed  
247 that participants’ methods are specific to SARS-CoV-2 and do not routinely yield false positive  
248 results for FIPV.

#### 249 *Analytical sensitivity and efficiency of methods*

250 Analytical sensitivity was evaluated with  $LOD_{95\text{eff. vol.}}$  (Table 3), which was calculated based on  
251 the actual RNA copy number added to the PCR for each individual analyst (i.e., effective volume  
252 for each spiking level). The effective volumes tested varied by a factor of 22 among analysts and

253 ranged from 0.5 to 11.1  $\mu\text{L}$  (Table 3). The  $\text{LOD}_{95_{\text{eff. vol.}}}$  values greatly varied among participants  
254 and markers they used. Sensitivities for N1 and N2 markers were summarized (Table 5),  
255 including  $\text{LOD}_{95_{\text{eff. vol.}}}$  values calculated for AIN 283 and AIN 266, which may be considered as  
256 outliers. Specifically, AIN 283 and AIN 266 reported Ct values for multiple samples at low spike  
257 levels ( $\leq 200$  copies) (Supplemental Table 2). However, those values were counted as not  
258 detected due to being higher than the Ct cut-off values established by the analysts. This indicates  
259 that the methods in these two laboratories are likely sensitive enough to detect more samples at  
260 lower spike levels, but established Ct cut-off values were too stringent (i.e., unoptimized)  
261 resulting in more false negative results (see Table 2) affecting LODs in these two laboratories.  
262 Thus,  $\text{LOD}_{95_{\text{eff. vol.}}}$  calculations with these two laboratories (AIN 283 and 266 for N1 and N2)  
263 are shown in Table 5; however,  $\text{LOD}_{95_{\text{eff. vol.}}}$  with these two laboratories excluded are interpreted  
264 below.

265 As mentioned above,  $\text{LOD}_{95_{\text{eff. vol.}}}$  values from participants were combined for each marker  
266 and their median, minimum, and maximum  $\text{LOD}_{95_{\text{eff. vol.}}}$  values for comparative evaluation  
267 (Table 5). The  $\text{LOD}_{95_{\text{eff. vol.}}}$  values ranged from 2.0 to 66.8 for the N1 marker, with a median of  
268 6.7. This corresponded to a factor of around 30 between the lowest and highest values; while  
269 some analysts detected every copy of SARS-CoV-2 RNA, others only detected less than 10% of  
270 the copies. For the N2 marker, the  $\text{LOD}_{95_{\text{eff. vol.}}}$  values ranged from 1.9 to 22.9 with the median  
271 value of 4.6 copies indicating that methods based on N2 marker were the most sensitive in ILC2.  
272 An ideal  $\text{LOD}_{95_{\text{eff. vol.}}}$  is calculated to be 3 copies per PCR reaction based on a hypothetical POD  
273 curve<sup>28</sup>. Due to random variation,  $\text{LOD}_{95_{\text{eff. vol.}}}$  values below 3 may be observed. For the N1  
274 marker, 30 out of 36 analysts (83%) had an  $\text{LOD}_{95_{\text{eff. vol.}}}$  value  $\leq 20$  copies and 20 out of 37  
275 analysts (54%) had an  $\text{LOD}_{95_{\text{eff. vol.}}}$  value not statistically significantly greater than 3 (meaning

276 that the  $LOD_{95_{eff. vol.}}$  is within the margin of error of the best possible value). For the N2 marker,  
277 33 out of 34 analysts (97%) had an  $LOD_{95_{eff. vol.}}$  value  $\leq 20$  copies and 27 out of 36 analysts  
278 (75%) had an  $LOD_{95_{eff. vol.}}$  value not statistically significantly greater than 3. For the E and N3  
279 markers, all analysts (100%) had  $LOD_{95_{eff. vol.}}$  values at  $\leq 20$  copies. For the N, ORF1ab and  
280 RdRP markers, only half of the analysts had  $LOD_{95_{eff. vol.}}$  near or equal to the best possible LOD  
281 – theoretical minimum of 3 copies. For the S marker, none of the analysts had  $LOD_{95_{eff. vol.}}$  near  
282 or equal to the best possible value of 3 copies and only 1 out of 7 analysts (14%) had an  
283  $LOD_{95_{eff. vol.}}$  below 20 copies.

284 Calculated efficiency greatly varied among participants and markers they used as well (Table  
285 3). In general, PCR efficiency of 100% indicates that the target sequence of interest doubles  
286 during each cycle. If the Ct values change less than 3.3 cycles between 10-fold dilutions of the  
287 PCR template, it resulted in efficiency values that were greater than 100%. Some of the  
288 calculated efficiencies are indeed higher than 100%, which could be interpreted as an indication  
289 of problems in the amplification process. On the other hand, it should be noted here that the  
290 calculation of efficiencies is associated with considerable statistical uncertainty due to  
291 unavoidable random fluctuations in the Ct values. This is especially true when - as in the present  
292 case - the underlying dilution levels differ by only a few orders of magnitude.

293

294

## Discussion

295 The ILC2 provides insight into performance of methods to detect SARS-CoV-2 RNA in  
296 PrimeStore molecular transport medium. ILC2 demonstrated that most participants have  
297 relatively sensitive and specific methods to detect three SARS-CoV-2 variants.

298           The testing methods varied between laboratories, as the participating analysts were  
299 instructed to follow their routine SARS-CoV-2 detection procedure for ILC2. This, plus the  
300 variability in the laboratory's Ct cut-off values, resulted in some inconsistency in interpretations  
301 among different analysts. For a study such as ILC2 where various extraction and detection  
302 methods were involved, applying a universal Ct cut-off value for each marker to provide a score  
303 for each individual analyst is not realistic. Method information provided by each analyst allowed  
304 the ILC-2 organizers to statistically identify possible correlations with result variability. Analyst-  
305 specific results broken down by Ct values for different markers and with extraction and PCR  
306 methods annotated were summarized and provided to the analysts in an ILC2 report. These data  
307 are not shown in this manuscript to protect confidentiality of participants, particularly those who  
308 were using methods unique to their laboratory.

309           Most of the participating laboratories used the CDC N1 and N2 assays for detecting the  
310 SARS-CoV-2 RNA. Research has reported one marker as more sensitive than the other or vice  
311 versa<sup>29,30</sup>. In the ILC1<sup>20</sup>, differences in ROD values between the two markers were very minor.  
312 In the current ILC2, the ROD values were higher for N2 than for N1, especially for 50 to 100  
313 copies/50  $\mu$ L for the B.1 variant. The LOD95<sub>eff. vol.</sub> values generated for the N1 and N2 markers  
314 indicated that 81% and 92% of ILC2 analysts, respectively, demonstrated an LOD95<sub>eff. vol.</sub> value  
315 below 20 copies.

316           The relationship between the effective volumes used and the observed LOD95<sub>eff. vol.</sub>  
317 values was not significant (Table 3). While it cannot be ruled out that high effective volumes  
318 make it more difficult to detect all copies, the observed LOD95<sub>eff. vol.</sub> values also depend on other  
319 factors. These factors may include extraction kit, PCR kit, reagents, model/type of equipment  
320 such as PCR machine, centrifuges and pipettes, level of analyst's experience, quality control

321 system in laboratory, multiplex versus single-plex approaches and others. Information on some  
322 of these factors was provided in the confidential report for the participants. The variability in Ct  
323 values observed for particular analysts is also informative and can point to potential issues with  
324 methods that may affect success of analysts in future exercises (Supplemental Tables 2-6).

325         The ILC2 study demonstrated a successful collaboration involving government agencies,  
326 universities, and private industry. By using a larger range of SARS-CoV-2 RNA spiking levels,  
327 including lower concentrations, the LOD<sub>95<sub>eff. vol.</sub></sub> values of the methods used by participating  
328 analysts were evaluated more accurately than we did in ILC1. The laboratories were able to  
329 detect Alpha and Beta variants of SARS-COV-2 with their current methods. The method  
330 specificity was confirmed by using FIPV RNA as a confounder and reached over 99%. In  
331 summary, the ILC2 was a success in meeting the stated objectives. The exercise allowed  
332 organizers not only to characterize important parameters of participants' method performance  
333 (e.g., analytical sensitivity and specificity, efficiency, and suitability for different variants) but  
334 also allowed participants to compare their performance to each other. Organizers processed the  
335 submitted data using various statistical approaches that allowed them to identify possible  
336 weaknesses and strengths of methods used, and offer suggestions on improving participants'  
337 performance in the future. Specifically, an important finding of the ILC2 is that individual  
338 analysts used different decision-making criteria during interpretation of similar datasets. This  
339 indicates a need for laboratories to review data from this exercise and potentially reassess their  
340 decision-making criteria during interpretation of Ct values when using multiple markers. The  
341 ILC2 study also indicates that the false negative rate and sensitivity of some methods can be  
342 improved if Ct cut-off values used are re-evaluated (e.g., on a test that a too stringent Ct cut-off  
343 value was originally used) and optimized by analysts accordingly. In the current era of rapidly

344 developing methodology and lack of international standards, participation in ILCs like this study  
345 is very beneficial. In contrast to other types of proficiency testing exercises that only aim to  
346 assess which results are correct or incorrect, this ILC revealed much more about the methods  
347 used and assist participants in continuous efforts to improve performance.  
348



349 **Acknowledgments**

350 We acknowledge the diligence and hard work of the laboratory scientists who rapidly developed  
351 SARS-CoV-2 assays for animals and participated in this collaborative study.

352 We acknowledge the following individuals for technical assistance and administrative support:  
353 Angelica Jones, Olgica Ceric, Ellen Hart, and Dave Rotstein from FDA, Joseph Flint from  
354 Cornell University, and Mia Torchetti and Christina Loiacono from USDA. We also thank  
355 Kirsten Simon from QuoData for supporting and facilitating this work. The Genomics Facility of  
356 the Biotechnology Resource Center at the Cornell University Institute of Biotechnology assisted  
357 with copy number quantification, and we thank Peter Schweitzer for facilitating this. We also  
358 thank Robert Newkirk from FDA CFSAN Proficiency Team for sample shipment assistance.

359 **Disclaimer**

360 The views expressed in this article are those of the authors and do not necessarily reflect the  
361 official policy of the Department of Health and Human Services, the U.S. Food and Drug  
362 Administration, or the U.S. Government. The use of trade, firm, or product names is for  
363 descriptive purposes only and does not imply endorsement by the U.S. Government.

364 **Declaration of conflicting interests**

365 The authors declared no potential conflicts of interest with respect to the research, authorship,  
366 and/or publication of this article.

367 **Funding**

368 The ILC2 was funded by FDA's Vet-LIRN program, and laboratories were not charged to  
369 participate in this exercise. Vet-LIRN laboratories may have also used infrastructure grant funds  
370 provided via Vet-LIRN funding opportunity PAR-17-141 to cover the cost of supplies.

371 **Supplemental material**

372 Supplemental material for this article is available online.

373 **References**

- 374 1. Ksiazek TG, Erdman D, Goldsmith CS, et al. A novel coronavirus associated with severe  
375 acute respiratory syndrome. *N Engl J Med* 2003;348:1953-1966.
- 376 2. Coleman CM, Frieman MB. Emergence of the Middle East respiratory syndrome coronavirus.  
377 *PLoS Pathog* 2013;9:e1003595.
- 378 3. Oude Munnink BB, Sikkema RS, Nieuwenhuijse DF, et al. Jumping back and forth:  
379 anthropozoonotic and zoonotic transmission of SARS-CoV-2 on mink farms. *bioRxiv* 2020.
- 380 4. Oude Munnink BB, Sikkema RS, Nieuwenhuijse DF, et al. Transmission of SARS-CoV-2 on  
381 mink farms between humans and mink and back to humans. *Science* 2021;371:172-177.
- 382 5. He S, Han J, Lichtfouse E. Backward transmission of COVID-19 from humans to animals  
383 may propagate reinfections and induce vaccine failure. *Environ Chem Lett* 2021;3:1-6.
- 384 6. Kumar R, Harilal S, Al-Sehemi AG, et al. COVID-19 and domestic animals: exploring the  
385 species barrier crossing, zoonotic and reverse zoonotic transmission of SARS-CoV-2. *Curr*  
386 *Pharm Des* 2021;27:1194-1201.
- 387 7. Anonymous. Animals and COVID-19. In. [https://www.cdc.gov/coronavirus/2019-ncov/daily-](https://www.cdc.gov/coronavirus/2019-ncov/daily-life-coping/animals.html)  
388 [life-coping/animals.html](https://www.cdc.gov/coronavirus/2019-ncov/daily-life-coping/animals.html): Centers for Disease Control and Prevention; 2021.
- 389 8. Newman A, Smith D, Ghai RR, et al. First reported cases of SARS-CoV-2 infection in  
390 companion animals - New York, March-April 2020. *MMWR Morb Mortal Wkly Rep*  
391 2020;69:710-713.
- 392 9. Hamer SA, Pauvolid-Corrêa A, Zecca IB, et al. Natural SARS-CoV-2 infections, including  
393 virus isolation, among serially tested cats and dogs in households with confirmed human  
394 COVID-19 cases in Texas, USA. *bioRxiv* 2020.

- 395 10. McAloose D, Laverack M, Wang L, et al. From people to panthera: natural SARS-CoV-2  
396 infection in tigers and lions at the Bronx zoo. *mBio* 2020;11.
- 397 11. Lee AC, Zhang AJ, Chan JF, et al. Oral SARS-CoV-2 inoculation establishes subclinical  
398 respiratory infection with virus shedding in golden Syrian hamsters. *Cell Rep Med*  
399 2020;1:100121.
- 400 12. Meisner J, Baszler TV, Kuehl KH, et al. Household transmission of SARS-CoV-2 from  
401 humans to dogs in Washington and Idaho: burden and risk factors. *bioRxiv* 2021.
- 402 13. Ruiz-Arrondo I, Portillo A, Palomar AM, et al. Detection of SARS-CoV-2 in pets living  
403 with COVID-19 owners diagnosed during the COVID-19 lockdown in Spain: A case of an  
404 asymptomatic cat with SARS-CoV-2 in Europe. *Transbound Emerg Dis* 2021;68:973-976.
- 405 14. Sailleau C, Dumarest M, Vanhomwegen J, et al. First detection and genome sequencing of  
406 SARS-CoV-2 in an infected cat in France. *Transbound Emerg Dis* 2020;67:2324-2328.
- 407 15. Segales J, Puig M, Rodon J, et al. Detection of SARS-CoV-2 in a cat owned by a COVID-  
408 19-affected patient in Spain. *Proc Natl Acad Sci U S A* 2020;117:24790-24793.
- 409 16. U.S. Department of Agriculture. Cases of SARS-CoV-2 in Animals in the United States, .  
410 In. [https://www.aphis.usda.gov/animal\\_health/one\\_health/downloads/sars-cov2-in-animals.pdf](https://www.aphis.usda.gov/animal_health/one_health/downloads/sars-cov2-in-animals.pdf).:  
411 2020.
- 412 17. Wacharapluesadee S, Tan CW, Maneerom P, et al. Evidence for SARS-CoV-2 related  
413 coronaviruses circulating in bats and pangolins in Southeast Asia. *Nat Commun* 2021;12:972.
- 414 18. Ip HS, Griffin KM, Messer JD, et al. An opportunistic survey reveals an unexpected  
415 coronavirus diversity hotspot in North America. *Viruses* 2021;13:2016-2028.

- 416 19. Kaneene JB, Warnick LD, Bolin CA, et al. Changes in multidrug resistance of enteric  
417 bacteria following an intervention to reduce antimicrobial resistance in dairy calves. *J Clin*  
418 *Microbiol* 2009;47:4109-4112.
- 419 20. Deng K, Uhlig S, Ip HS, et al. Interlaboratory comparison of SARS-CoV2 molecular  
420 detection assays in use by U.S. veterinary diagnostic laboratories. *J Vet Diagn Invest* 2021.
- 421 21. Badua C, Baldo KAT, Medina PMB. Genomic and proteomic mutation landscapes of  
422 SARS-CoV-2. *J Med Virol* 2021;93:1702-1721.
- 423 22. Galloway SE. Emergence of SARS-CoV-2 B.1.1.7 Lineage — United States, December 29,  
424 2020–January 12, 2021. *MMWR* 2021;70:95-99.
- 425 23. Tegally H, Wilkinson E, Giovanetti M, et al. Detection of a SARS-CoV-2 variant of concern  
426 in South Africa. *Nature* 2021;592:438-443.
- 427 24. O'Brien A, Mettelman RC, Volk A, et al. Characterizing replication kinetics and plaque  
428 production of type I feline infectious peritonitis virus in three feline cell lines. *Virology*  
429 2018;525:1-9.
- 430 25. Dye C, Helps CR, Siddell SG. Evaluation of real-time RT-PCR for the quantification of  
431 FCoV shedding in the faeces of domestic cats. *J Feline Med Surg* 2008;10:167-174.
- 432 26. Anonymous. CDC 2019-novel coronavirus (2019-nCoV) real-time RT-PCR diagnostic panel  
433 for emergency use only instructions for use. In. <https://www.fda.gov/media/134922/download>:  
434 Centers for Disease Control and Prevention; 2020.
- 435 27. International Organization for Standardization. Microbiology of the food chain -- Method  
436 validation -- Part 2: Protocol for the validation of alternative (proprietary) methods against a  
437 reference method. In: ISO 16140-2:20162016.

- 438 28. Uhlig S, Frost K, Colson B, et al. Validation of qualitative PCR methods on the basis of  
439 mathematical statistical modelling of the probability of detection. *Accreditation and Quality*  
440 *Assurance* 2015;20:75-83.
- 441 29. Vogels CBF, Brito AF, Wyllie AL, et al. Analytical sensitivity and efficiency comparisons  
442 of SARS-CoV-2 RT-qPCR primer-probe sets. *Nat Microbiol* 2020;5:1299-1305.
- 443 30. Perchetti GA, Nalla AK, Huang ML, et al. Validation of SARS-CoV-2 detection across  
444 multiple specimen types. *J Clin Virol* 2020;128:104438.
- 445
- 446

447 **Table 1.** ILC2 samples description and RNA concentration.  
448

| Sample ID | Sample Description and RNA Concentration   |
|-----------|--------------------------------------------|
| VM01      | Blank MTM                                  |
| VM11      |                                            |
| VM05      | Blank + FIPV RNA ~10,000 copies /50 µL MTM |
| VM10      |                                            |
| VM06      | (B.1) 10 copies /50 µL MTM                 |
| VM09      |                                            |
| VM08      | (B.1) 50 copies /50 µL MTM                 |
| VM16      |                                            |
| VM20      |                                            |
| VM07      | (B.1) 100 copies /50 µL MTM                |
| VM19      |                                            |
| VM03      | (B.1) 200 copies /50 µL MTM                |
| VM12      |                                            |
| VM04      | (B.1) 500 copies /50 µL MTM                |
| VM18      |                                            |
| VM17      | (B.1) 10,000 copies /50 µL MTM             |
| VM15      | (Alpha, B.1.1.7) 500 copies/50 µL MTM      |
| VM13      | (Alpha, B.1.1.7) 10,000 copies/50 µL MTM   |
| VM14      | (Beta, B.1.351) 500 copies/50 µL MTM       |
| VM02      | (Beta, B.1.351) 10,000 copies/50 µL MTM    |

449 All samples are prepared in Primestore Molecular Transport Medium (MTM).  
450





457 detected (e.g., one marker was detected out of two targeted markers or three markers were detected out of four targeted markers). White color cell  
458 means that analyst reported Detected (D) when all targeted markers were detected, and analyst reported Not Detected (N) when all targeted  
459 markers were undetected.

460 **Table 3.** Sensitivity (LOD95<sub>eff. vol.</sub>) and PCR efficiency for each marker

| AIN | Effective volume †<br>(μl) | Ct Cut Off Values | LOD95 <sub>eff. volume</sub> ‡ and efficiency (%) |               |              |              |            |              |        |            |
|-----|----------------------------|-------------------|---------------------------------------------------|---------------|--------------|--------------|------------|--------------|--------|------------|
|     |                            |                   | N1                                                | N2            | N            | N3           | E          | RdRP         | ORF1ab | S          |
| 278 | 0.5                        | 45                | 2.0 ** (210%)                                     | 1.9 ** (106%) |              |              |            |              |        |            |
| 276 | 0.5                        | 40                | 3.1 (117%)                                        | 4.6 (115%)    |              |              |            |              |        |            |
| 263 | 1.1                        | 40                | 12.7 (114%)                                       | 4.4 (106%)    |              |              |            |              |        |            |
| 293 | 2.5                        | 40                | 14.1 (260%)                                       | 6.4 (158%)    |              |              |            |              |        |            |
| 291 | 2.5                        | 40                | 16.8 (193%)                                       | 14.9 (155%)   |              |              |            |              |        |            |
| 285 | 2.5                        | 45                | 3.3 (107%)                                        | 3.3 (83%)     |              |              |            |              |        |            |
| 247 | 2.5                        | 45                |                                                   |               |              |              |            | 7.4 (140%)   |        |            |
| 250 | 2.5                        | 40                |                                                   |               | 26.7 (204%)  |              |            |              |        |            |
| 262 | 2.5                        | 40                |                                                   |               | 6.6 * (99%)  |              |            |              |        |            |
| 294 | 2.5                        | 40                |                                                   |               | 4.9 (85%)    |              |            |              |        |            |
| 283 | 2.8                        | 36                | >556 (87%)                                        | 106.7 (101%)  |              |              |            |              |        |            |
| 289 | 2.8                        | 40                | 10.9 (106%)                                       | 7.1 (104%)    |              |              |            |              |        |            |
| 241 | 2.8                        | 39.99             | 10.9 (88%)                                        | 3.7 (102%)    |              |              |            |              |        | 18.2 (92%) |
| 280 | 2.8                        | 40                | 10.9 (97%)                                        | 8.2 (90%)     |              |              |            |              |        |            |
| 246 | 2.8                        | 40                | 13.2 (111%)                                       | 3.7 (120%)    |              |              |            |              |        |            |
| 282 | 2.8                        | 40                | 15.7 (101%)                                       | 22.9 (79%)    |              |              |            |              |        |            |
| 267 | 2.8                        | 40                | 17 (125%)                                         | 6.4 (201%)    |              |              |            |              |        |            |
| 279 | 2.8                        | 40                | 2.0 ** (122%)                                     | 2.0 ** (108%) |              |              |            |              |        |            |
| 265 | 2.8                        | 40                | 2.0 ** (94%)                                      | 4.6 * (80%)   |              |              |            |              |        |            |
| 258 | 2.8                        | 40                | 2.0 ** (96%)                                      | 7.1 (93%)     |              |              |            |              |        |            |
| 245 | 2.8                        | 45                | 22.9 (112%)                                       | 3.7 (103%)    |              |              |            |              |        |            |
| 257 | 2.8                        | 45                | 3.7 (106%)                                        | 3.7 (92%)     |              |              |            |              |        |            |
| 256 | 2.8                        | 40                | 3.7 (91%)                                         | 2.0 ** (100%) |              |              |            |              |        |            |
| 249 | 2.8                        | 45                | 3.7 (92%)                                         |               | 5.2 (132%)   |              |            |              |        |            |
| 274 | 2.8                        | 45                | 34.1 (154%)                                       | 10.9 (129%)   |              |              |            |              |        |            |
| 261 | 2.8                        | 40                | 4.6 * (101%)                                      | 4.6 * (111%)  |              |              |            |              |        |            |
| 284 | 2.8                        | 40                | 4.6 * (101%)                                      | 4.6 * (86%)   |              |              |            |              |        |            |
| 255 | 2.8                        | 45                | 4.6 * (95%)                                       | 2.0 ** (67%)  |              | 2.0 ** (99%) |            |              |        |            |
| 242 | 2.8                        | 40                | 41.8 (114%)                                       | 8.2 (100%)    |              |              |            |              |        |            |
| 273 | 2.8                        | 40                | 55.9 (107%)                                       | 7.1 (108%)    |              |              |            |              |        |            |
| 252 | 2.8                        | 40                |                                                   |               |              |              | 3.7 (88%)  | 4.6 * (111%) |        |            |
| 269 | 3.1                        | 40                | 8 (112%)                                          | 8 (134%)      |              |              |            |              |        |            |
| 275 | 3.9                        | 45                |                                                   |               | 6.5 * (106%) |              |            |              |        |            |
| 271 | 4.2                        | 40                | 3 (104%)                                          | 3 (91%)       |              |              |            |              |        |            |
| 244 | 4.2                        | 40                | 3 (110%)                                          | 3 (99%)       |              |              |            |              |        |            |
| 266 | 4.4                        | 37                | 36.6 (136%)                                       | 104 (84%)     |              |              |            |              |        |            |
| 254 | 5                          | 40                | 12.8 (119%)                                       | 9.3 (109%)    |              |              |            |              |        |            |
| 290 | 5                          | 40                | 6.7 (102%)                                        | 3.6 (108%)    |              |              |            |              |        |            |
| 268 | 5                          | 45                | 6.7 (110%)                                        | 8.3 * (108%)  |              |              |            |              |        |            |
| 253 | 5                          | 45                | 66.8 (72%)                                        | 9.3 (107%)    |              |              |            |              |        |            |
| 259 | 5                          | 40                |                                                   |               |              |              | 3.6 (135%) | 57 (100%)    |        |            |
| 270 | 5                          | 40                |                                                   |               |              |              | 6.7 (102%) | 16 (93%)     |        |            |

|     |      |    |               |            |              |  |               |             |              |             |
|-----|------|----|---------------|------------|--------------|--|---------------|-------------|--------------|-------------|
| 286 | 5    | 45 |               |            |              |  | 6.7 (126%)    |             | 2.4 ** (84%) |             |
| 248 | 5.6  | 45 |               |            | 9.3 * (138%) |  |               |             |              |             |
| 287 | 5.8  | 38 |               |            | 9.7 * (108%) |  |               |             |              |             |
| 240 | 6.7  | 37 |               |            | 29.6 (94%)   |  |               |             | 4.8 (115%)   | 52.9 (88%)  |
| 295 | 7    | 40 |               |            | 3.2 (92%)    |  |               |             |              |             |
| 288 | 8    | 36 |               |            |              |  | 13.3 * (103%) | 31.4 (101%) |              |             |
| 292 | 8    | 36 |               |            |              |  | 13.3 * (126%) | 5.7 (101%)  |              |             |
| 277 | 8.3  | 40 | 6 (117%)      | 6 (99%)    |              |  |               |             |              |             |
| 296 | 8.9  | 40 | 6.4 (104%)    | 3.7 (111%) |              |  |               |             |              |             |
| 243 | 10   | 37 |               |            | 25.6 (107%)  |  |               |             | 7.2 (121%)   | 79.3 (85%)  |
| 251 | 10   | 37 |               |            | 56.4 (119%)  |  |               |             | 7.2 (115%)   | >2000 (65%) |
| 260 | 10   | 37 |               |            | 91.6 (73%)   |  |               |             | 122.7 (64%)  | >2000 (59%) |
| 264 | 10   | 37 |               |            | 82.5 (88%)   |  |               |             | 56.4 (94%)   | >2000 (70%) |
| 272 | 10   | 39 |               |            | 44.4 (97%)   |  |               |             | 13.3 (108%)  | >2000 (93%) |
| 281 | 11.1 | 40 | 18.5 * (110%) | 8 (104%)   |              |  |               |             |              |             |

461 † Effective volume is that part of the original sample volume used in the PCR by each analyst. It was  
462 calculated based on three volumes (e.g., extraction, elution and PCR input) used and reported by analysts.  
463 ‡ LOD<sub>95,eff. vol.</sub> is the number of copies in a PCR reaction at which a POD of 95% is achieved based on the  
464 effective volume used.  
465 \* Upper limit of confidence interval as there are no false negative results.  
466 \*\* Value is not significantly lower than the theoretical optimum of 3 target copies.  
467

468 **Table 4.** Rate of detection (ROD) calculated for all participants (e.g., overall detection) and for  
 469 those who used N1 and N2 markers

| SARS-CoV-2 RNA spiking level                    | Number of PCR replicates | Rate of detection (ROD) across analysts* |      |      |
|-------------------------------------------------|--------------------------|------------------------------------------|------|------|
|                                                 |                          | Overall detection                        | N1   | N2   |
| Number of analysts included in the calculations |                          | 57                                       | 37   | 36   |
| Blank                                           | 2                        | 1%                                       | 0%   | 0%   |
| Blank + 10,000 FIPV copies / 50 µL              | 2                        | 1%                                       | 0%   | 3%   |
| B.1 10 copies / 50 µL                           | 2                        | 26%                                      | 30%  | 35%  |
| B.1 50 / 50 µL                                  | 3                        | 65%                                      | 56%  | 70%  |
| B.1 100 copies / 50 µL                          | 2                        | 85%                                      | 81%  | 92%  |
| B.1 200 copies / 50 µL                          | 2                        | 91%                                      | 95%  | 96%  |
| B.1 500 copies / 50 µL                          | 2                        | 96%                                      | 95%  | 100% |
| B.1 10,000 copies / 50 µL                       | 1                        | 98%                                      | 100% | 97%  |
| Alpha (B.1.1.7) 500 copies / 50 µL              | 1                        | 96%                                      | 97%  | 100% |
| Alpha (B.1.1.7) 10,000 copies / 50 µL           | 1                        | 100%                                     | 100% | 100% |
| Beta (B.1.351) 500 copies / 50 µL               | 1                        | 98%                                      | 97%  | 100% |
| Beta (B.1.351) 10,000 copies / 50 µL            | 1                        | 100%                                     | 100% | 100% |

470 \* ROD values were calculated based on the original (i.e., not rounded) Ct values. Inconclusive results and  
 471 results with Ct values higher than the analyst-specific cut-off were classified as “not detected” in this  
 472 statistical summary.

473

474 **Table 5.** Comparative summary of sensitivity per each marker

| Marker | Total number of analysts | No. of analysts without false negative results | Median LOD95 <sub>eff. vol.</sub> | Minimum LOD95 <sub>eff. vol.</sub> | Maximum LOD95 <sub>eff. vol.</sub> | Number of analysts with LOD95 <sub>eff. vol.</sub> at ≤ 20 copies |
|--------|--------------------------|------------------------------------------------|-----------------------------------|------------------------------------|------------------------------------|-------------------------------------------------------------------|
| N1     | 37                       | 4                                              | 8.0                               | 2.0                                | >556                               | 30/37 (81%)                                                       |
| N1*    | 36                       | 4                                              | 6.7                               | 2.0                                | 66.8                               | 30/36 (83%)                                                       |
| N2     | 36                       | 4                                              | 5.3                               | 1.9                                | 106.7                              | 33/36 (92%)                                                       |
| N2**   | 34                       | 4                                              | 4.6                               | 1.9                                | 22.9                               | 33/34 (97%)                                                       |
| E      | 6                        | 2                                              | 6.7                               | 3.6                                | 13.3                               | 6/6 (100%)                                                        |
| N      | 14                       | 4                                              | 17.7                              | 3.2                                | 91.6                               | 7/14 (50%)                                                        |
| N3     | 1                        | ---                                            | ---                               | ---                                | ---                                | 1/1 (100%)                                                        |
| ORF1ab | 7                        | 0                                              | 7.2                               | 2.4                                | 122.7                              | 5/7 (71%)                                                         |
| RdRP   | 6                        | 1                                              | 11.7                              | 4.6                                | 57.0                               | 4/6 (67%)                                                         |
| S      | 7                        | 0                                              | 52.9                              | 18.2                               | 79.3                               | 1/7 (14%)                                                         |

475 \* An LOD<sub>eff. vol.</sub> value of >556 copies by AIN 283 was excluded from the summary because this value  
 476 was considered as an outlier due to unoptimized (i.e., too stringent) Ct cut-off values used by the analyst  
 477 and substantially affecting the summary of LODs for N1 marker.

478 \*\* LOD95<sub>eff. vol.</sub> values of 106 copies (AIN 283) and 104 copies (AIN 266) were excluded from  
 479 calculations for the same reason described above.
